# Supplementary material
Source: PubMed Central journal article supplement (PMC3190814)
Supplement: supp_M111.234997_jbc.M111.234997-1.pdf [file supp_M111.234997_jbc.M111.234997-1.pdf]

## **LEGEND TO THE SUPPLEMENTARY FIGURE**

Supplementary Figure 1. Expression of c-fos did not promote the degradation of polyQ. Lysates of Neuro2A cells transfected with indicated vector were immunoblotted with indicated antibodies.

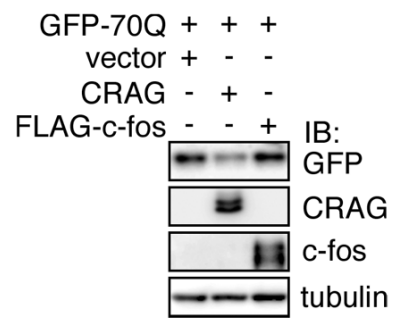

Supplemental Figure
